# Supplementary material
Source: Springer Nature journal article supplement (http://www.springermedizin.de/resource/supplementary/12913_2009_1258_MOESM3_ESM.pdf/9527718)
Supplement: MOESM3 [file 9527718]

Patients referred to the  
surgical departments  
n = 301

No daily smoking  
n = 176

No hazardous drinking  
n = 201

Daily smoking\*  
n = 57

Hazardous drinking\*  
n = 27

\* 12 patients did both

No smoking history  
n = 68

No alcohol history  
n = 73

Daily smokers and  
hazardous drinkers referred  
to preoperative smoking  
and alcohol intervention

n = 7

Daily smokers and  
hazardous drinkers not  
referred to preoperative  
smoking and alcohol  
intervention

n = 65
